# Supplementary material
Source: ML conference proceedings conference paper supplement (https://www.ecva.net/papers/eccv_2020/papers_ECCV/html/123720086_ECCV_2020_paper.php)
Supplement: Supplementary file 1 [file 123720086-supp.pdf]

**Supplementary Material for “DBQ: A  
Differentiable Branch Quantizer for Lightweight  
Deep Neural Networks ”**

# Table of Contents

|                                                                                                                    |   |
|--------------------------------------------------------------------------------------------------------------------|---|
| Supplementary Material for “DBQ: A Differentiable Branch Quantizer<br>for Lightweight Deep Neural Networks ” ..... | 1 |
| 1 Experimental Setup .....                                                                                         | 3 |
| 1.1 CIFAR-10 .....                                                                                                 | 3 |
| Data Augmentation .....                                                                                            | 3 |
| Training Hyperparameters .....                                                                                     | 3 |
| 1.2 ImageNet .....                                                                                                 | 3 |
| Data Augmentation .....                                                                                            | 3 |
| Training Hyperparameters .....                                                                                     | 3 |
| 1.3 Visual Wake Words .....                                                                                        | 4 |
| Data Augmentation .....                                                                                            | 4 |
| Training Hyperparameters .....                                                                                     | 4 |
| 2 Gradient Derivations .....                                                                                       | 4 |
| 2.1 Notation .....                                                                                                 | 5 |
| 2.2 Derivations .....                                                                                              | 6 |
| Post-quantization Scale .....                                                                                      | 6 |
| Ternary Branch Scales .....                                                                                        | 6 |
| Quantizer Thresholds .....                                                                                         | 6 |
| Pre-quantization Scale .....                                                                                       | 6 |
| Full Precision Weights .....                                                                                       | 7 |
| 3 MobileNetV2 on ImageNet Comparisons .....                                                                        | 7 |
| 4 DBQ Branch Sparsity .....                                                                                        | 7 |

## 1 Experimental Setup

In this section, we describe the experimental setup used for generating all our results.

### 1.1 CIFAR-10

**Data Augmentation** The CIFAR-10 dataset consists of  $32 \times 32$  RGB images. For generating the training samples, we adopt the standard data augmentation used in [3] where each image is: 1) zero-padded with 4 pixels on each side; 2) horizontally flipped with probability 0.5; and 3) randomly cropped using a  $32 \times 32$  window. During testing, we use the  $32 \times 32$  images as is from the testing set. We also normalize the images, for both training and testing, using a per-channel mean and standard deviation calculated across the training set.

**Training Hyperparameters** For training the full precision (FP) ResNet-20 baseline on CIFAR-10, we use SGD with momentum  $\beta = 0.9$ , batch size of 100, and weight decay of  $\lambda = 10^{-4}$ . The FP model is trained for a total of  $E_T = 200$  epochs, with an initial learning rate  $\eta_0 = 0.1$  and a cosine update rule [4]:

$$\eta_e = \frac{\eta_0}{2} \left( 1 + \cos \left( \frac{e}{E_T} \pi \right) \right) \quad (1)$$

During the fine-tuning process, i.e. training the model with weights initialized from the FP baseline, we train using the same setup as before, but for a fewer number of epochs  $E_T = 50$  and a smaller initial learning rate  $\eta_0 = 0.01$ . The DBQ models trained use a linear temperature increment schedule:

$$T_e = T_{\text{init}} + e \cdot T_{\text{inc}} \quad (2)$$

with an initial temperature  $T_{\text{init}} = 5$  and increments  $T_{\text{inc}} = 2.5$ .

### 1.2 ImageNet

**Data Augmentation** For our ImageNet experiments, we follow the standard data augmentation used in [2], where during training, images are: 1) resized; 2) horizontally flipped; and 3) randomly cropped to  $224 \times 224$ . During testing, all images are resized to  $256 \times 256$  and then cropped to  $224 \times 224$ . We also normalize the input images on a per-channel basis.

**Training Hyperparameters** For training the full precision MobileNetV1 baseline on ImageNet, we use a similar setup as our CIFAR-10 experiments, with a slightly different learning rate schedule. Similar to [1], the first  $E_W$  epochs are used for learning rate "warm-up":

$$\eta_e = \frac{(e + 1)\eta_0}{E_W} \quad (3)$$

after which the remaining epochs utilize a cosine learning rate as described in (1). The hyperparameters used for both FP and quantization fine-tuning are specified in Table 1.

The full precision MobileNetV2 and ShuffleNetV2 baselines on ImageNet are pre-trained models obtained from PyTorch [5]. Their 2T quantized counterparts, MobileNetV2-2T and ShuffleNetV2-2T, are fine-tuned using the training hyperparameters described in Table 2.

|        | Batch Size | $\beta$ | $\lambda$          | $\eta_0$ | $E_W$ | $E_T$ | $T_{\text{init}}$ | $T_{\text{inc}}$ |
|--------|------------|---------|--------------------|----------|-------|-------|-------------------|------------------|
| FP     | 512        | 0.9     | $4 \times 10^{-5}$ | 0.1      | 5     | 150   | NA                | NA               |
| Quant. | 512        | 0.9     | $4 \times 10^{-5}$ | 0.001    | 0     | 50    | 50                | 20               |

**Table 1.** Training hyperparameters used for MobileNetV1 experiments on the ImageNet dataset.

|                 | Batch Size | $\beta$ | $\lambda$          | $\eta_0$           | $E_W$ | $E_T$ | $T_{\text{init}}$ | $T_{\text{inc}}$ |
|-----------------|------------|---------|--------------------|--------------------|-------|-------|-------------------|------------------|
| MobileNetV2-2T  | 256        | 0.9     | $4 \times 10^{-5}$ | $5 \times 10^{-4}$ | 0     | 50    | 25                | 10               |
| ShuffleNetV2-2T | 512        | 0.9     | $4 \times 10^{-5}$ | 0.001              | 0     | 30    | 25                | 10               |

**Table 2.** Training hyperparameters used for quantized MobileNetV2 and ShuffleNetV2 experiments on the ImageNet dataset.

### 1.3 Visual Wake Words

**Data Augmentation** For data augmentation during training, we follow the exact setup as our ImageNet experiments with input normalization and random horizontal flips and crops. During testing, images are normalized, resized to  $256 \times 256$ , and then cropped to  $224 \times 224$ .

**Training Hyperparameters** The training setup used is identical to our ImageNet experiments as well, and Table 3 specifies the values of the hyperparameters used for both full precision and quantization training.

## 2 Gradient Derivations

In this section, we provide derivations for the gradient expressions of the loss function  $\mathcal{L}$  with respect to the full precision weights  $\mathbf{w} \in \mathbb{R}^D$  and the quantizer

|        | Batch Size | $\beta$ | $\lambda$          | $\eta_0$ | $E_W$ | $E_T$ | $T_{\text{init}}$ | $T_{\text{inc}}$ |
|--------|------------|---------|--------------------|----------|-------|-------|-------------------|------------------|
| FP     | 512        | 0.9     | $4 \times 10^{-5}$ | 0.1      | 5     | 200   | NA                | NA               |
| Quant. | 512        | 0.9     | $4 \times 10^{-5}$ | 0.01     | 0     | 50    | 20                | 5                |

**Table 3.** Training hyperparameters used for experiments on the Visual Wake Words dataset.

parameters  $\mathcal{P}_Q = \{\alpha_1, \dots, \alpha_B, \gamma_1, \gamma_2, t_1, \dots, t_{N-1}\}$ . Recall that during training, the quantizer expression is:

$$\mathbf{z} = Q_T(\mathbf{w}) = \gamma_2 \left[ \sum_{i=1}^{N-1} \left[ \hat{f}_T(\gamma_1 \mathbf{w} - t_i) \sum_{j=1}^B b_{i,j} \alpha_j \right] - \sum_{j=1}^B \alpha_j \right] \quad (4)$$

where  $\hat{f}_T$  is the smooth approximation using the Sigmoid function:

$$\hat{f}_T(u) = \frac{1}{1 + \exp(-Tu)} \quad (5)$$

whose derivative can be easily written as:

$$\frac{\partial \hat{f}_T(u)}{\partial u} = T \hat{f}_T(u) [1 - \hat{f}_T(u)] \quad (6)$$

## 2.1 Notation

The derivations of these gradients involves computing derivatives with vectors. Thus, in this section we establish the appropriate notation. The derivative of a scalar  $y$  with respect to a  $D$ -dimensional vector  $\mathbf{x}$  is:

$$\frac{\partial y}{\partial \mathbf{x}} = \left[ \frac{\partial y}{\partial x_1} \quad \frac{\partial y}{\partial x_2} \quad \dots \quad \frac{\partial y}{\partial x_D} \right] \quad (7)$$

whereas the derivative of a vector  $\mathbf{y}$  with respect to a scalar  $x$  is:

$$\frac{\partial \mathbf{y}}{\partial x} = \begin{bmatrix} \frac{\partial y_1}{\partial x} \\ \frac{\partial y_2}{\partial x} \\ \vdots \\ \frac{\partial y_D}{\partial x} \end{bmatrix} \quad (8)$$

The derivative of a scalar  $y$  with respect to another scalar  $x$ , assuming  $y = g(\mathbf{z})$  and  $\mathbf{z} = f(x)$ , can therefore be computed using the chain rule:

$$\frac{\partial y}{\partial x} = \frac{\partial y}{\partial \mathbf{z}} \cdot \frac{\partial \mathbf{z}}{\partial x} = \left[ \frac{\partial y}{\partial z_1} \quad \frac{\partial y}{\partial z_2} \quad \dots \quad \frac{\partial y}{\partial z_D} \right] \begin{bmatrix} \frac{\partial z_1}{\partial x} \\ \frac{\partial z_2}{\partial x} \\ \vdots \\ \frac{\partial z_D}{\partial x} \end{bmatrix} = \sum_{k=1}^D \frac{\partial y}{\partial z_k} \cdot \frac{\partial z_k}{\partial x} \quad (9)$$

## 2.2 Derivations

**Post-quantization Scale** We notice that:

$$\frac{\partial z_k}{\partial \gamma_2} = \frac{z_k}{\gamma_2} \quad (10)$$

which can be plugged in to get the gradient using the chain rule:

$$\frac{\partial \mathcal{L}}{\partial \gamma_2} = \frac{\partial \mathcal{L}}{\partial \mathbf{z}} \cdot \frac{\partial \mathbf{z}}{\partial \gamma_2} = \sum_{k=1}^D \frac{\partial \mathcal{L}}{\partial z_k} \cdot \frac{\partial z_k}{\partial \gamma_2} = \frac{1}{\gamma_2} \sum_{k=1}^D \frac{\partial \mathcal{L}}{\partial z_k} z_k \quad (11)$$

**Ternary Branch Scales** We first compute  $\forall j \in [B]$ :

$$\frac{\partial z_k}{\partial \alpha_j} = \gamma_2 \left[ \sum_{i=1}^{N-1} [\hat{f}_T(\gamma_1 w_k - t_i) b_{i,j}] - 1 \right] = \gamma_2 \left[ \sum_{i=1}^{N-1} [g_{k,i} b_{i,j}] - 1 \right] \quad (12)$$

where  $g_{k,i} = \hat{f}_T(\gamma_1 w_k - t_i)$  for brevity. Therefore, using the chain rule we obtain:

$$\frac{\partial \mathcal{L}}{\partial \alpha_j} = \frac{\partial \mathcal{L}}{\partial \mathbf{z}} \cdot \frac{\partial \mathbf{z}}{\partial \alpha_j} = \sum_{k=1}^D \frac{\partial \mathcal{L}}{\partial z_k} \cdot \frac{\partial z_k}{\partial \alpha_j} = \gamma_2 \sum_{k=1}^D \frac{\partial \mathcal{L}}{\partial z_k} \left[ \sum_{i=1}^{N-1} [b_{i,j} g_{k,i}] - 1 \right] \quad (13)$$

**Quantizer Thresholds** We first utilize (6) in order to compute  $\forall i \in [N-1]$ :

$$\begin{aligned} \frac{\partial z_k}{\partial t_i} &= \gamma_2 \left[ \frac{\partial \hat{f}_T(\gamma_1 w_k - t_i)}{\partial t_i} \sum_{j=1}^B b_{i,j} \alpha_j \right] \\ &= -\gamma_2 T \left[ g_{k,i} (1 - g_{k,i}) \sum_{j=1}^B b_{i,j} \alpha_j \right] = -\gamma_2 T \left[ h_{k,i} \sum_{j=1}^B b_{i,j} \alpha_j \right] \end{aligned} \quad (14)$$

where  $h_{k,i} = g_{k,i} (1 - g_{k,i})$  for brevity. Therefore using the chain rule we obtain:

$$\frac{\partial \mathcal{L}}{\partial t_i} = \frac{\partial \mathcal{L}}{\partial \mathbf{z}} \cdot \frac{\partial \mathbf{z}}{\partial t_i} = \sum_{k=1}^D \frac{\partial \mathcal{L}}{\partial z_k} \cdot \frac{\partial z_k}{\partial t_i} = -\gamma_2 T \sum_{k=1}^D \frac{\partial \mathcal{L}}{\partial z_k} \left[ h_{k,i} \sum_{j=1}^B b_{i,j} \alpha_j \right] \quad (15)$$

**Pre-quantization Scale** Similarly, we utilize (6) in order to compute:

$$\frac{\partial z_k}{\partial \gamma_1} = \gamma_2 \left[ \sum_{i=1}^{N-1} \left[ \frac{\partial \hat{f}_T(\gamma_1 w_k - t_i)}{\partial \gamma_1} \sum_{j=1}^B b_{i,j} \alpha_j \right] \right] = \gamma_2 T w_k \left[ \sum_{i=1}^{N-1} \left[ h_{k,i} \sum_{j=1}^B b_{i,j} \alpha_j \right] \right] \quad (16)$$

and therefore applying the chain rule yields:

$$\frac{\partial \mathcal{L}}{\partial \gamma_1} = \frac{\partial \mathcal{L}}{\partial \mathbf{z}} \cdot \frac{\partial \mathbf{z}}{\partial \gamma_1} = \sum_{k=1}^D \frac{\partial \mathcal{L}}{\partial z_k} \cdot \frac{\partial z_k}{\partial \gamma_1} = \gamma_2 T \sum_{k=1}^D \frac{\partial \mathcal{L}}{\partial z_k} w_k \left[ \sum_{i=1}^{N-1} \left[ h_{k,i} \sum_{j=1}^B b_{i,j} \alpha_j \right] \right] \quad (17)$$

**Full Precision Weights** Finally, in order to compute the gradient of  $\mathcal{L}$  with respect to the full precision weights  $\mathbf{w} = [w_1, \dots, w_D]^T$ , we first compute  $\forall k \in [D]$ :

$$\begin{aligned} \frac{\partial z_m}{\partial w_k} &= \gamma_2 \left[ \sum_{i=1}^{N-1} \left[ \frac{\partial \hat{f}_T(\gamma_1 w_m - t_i)}{\partial w_k} \sum_{j=1}^B b_{i,j} \alpha_j \right] \right] \\ &= \begin{cases} \gamma_1 \gamma_2 T \left[ \sum_{i=1}^{N-1} \left[ h_{k,i} \sum_{j=1}^B b_{i,j} \alpha_j \right] \right], & \text{if } m = k \\ 0, & \text{otherwise} \end{cases} \end{aligned} \quad (18)$$

and using the chain rule, we obtain:

$$\frac{\partial \mathcal{L}}{\partial w_k} = \frac{\partial \mathcal{L}}{\partial \mathbf{z}} \cdot \frac{\partial \mathbf{z}}{\partial w_k} = \sum_{m=1}^D \frac{\partial \mathcal{L}}{\partial z_m} \cdot \frac{\partial z_m}{\partial w_k} = \gamma_1 \gamma_2 T \frac{\partial \mathcal{L}}{\partial z_k} \sum_{i=1}^{N-1} \left[ h_{k,i} \sum_{j=1}^B b_{i,j} \alpha_j \right] \quad (19)$$

### 3 MobileNetV2 on ImageNet Comparisons

We compare DBQ and [6] on MobileNetV2 in Table 4. [6] has two versions trained models M1 and M2, where M1 is trained with a memory constraint and M2 is not. We find that DBQ-2T is smaller than M2 [6] at iso-accuracy on ImageNet and more accurate than M1 [6] but at a larger storage cost. We are unable to compare the computational complexities since [6] lacks sufficient information, hence we adopt the metrics reported in [6], which are weight storage (analogous to  $\mathcal{C}_M$ ) and activation storage (analogous to  $\mathcal{C}_R - \mathcal{C}_M$ ).

| Model                | Top-1 Acc. [%] | Weight Storage [MB] | Activation Storage [MB] |
|----------------------|----------------|---------------------|-------------------------|
| M1 [6] (w/ constr.)  | 69.74          | 1.55                | 0.57                    |
| M2 [6] (w/o constr.) | 70.59          | 3.14                | 1.58                    |
| DBQ-2T               | <b>70.54</b>   | <b>2.43</b>         | <b>1.15</b>             |

**Table 4.** The Top-1 accuracy on ImageNet and Storage costs for MobileNetV2 using our method (DBQ-2T) compared to [6].

### 4 DBQ Branch Sparsity

One of the advantages of implementing ternary-based dot products is leveraging weight sparsity, which is reflected in our sparsity-aware computational cost  $\mathcal{C}_S$ . In this work, we show that for MobileNetV1 on ImageNet with two ternary branch quantization (DBQ-2T-4), the computational cost can be reduced from  $2.18 \times 10^{10}$  FAs to  $1.42 \times 10^{10}$  ( $\sim 35\%$  reduction) by simply skipping the operations involving zero weights. Table 5 reports the average branch level sparsity for

| PW Layer        | $C_{in}$ | $C_{out}$ | Average Branch Sparsity [%] |        |              |
|-----------------|----------|-----------|-----------------------------|--------|--------------|
|                 |          |           | FX8                         | DBQ-1T | DBQ-2T       |
| 0               | 64       | 32        | 35.55                       | 58.69  | 64.82        |
| 1               | 64       | 128       | 10.74                       | 41.42  | 51.75        |
| 2               | 128      | 128       | 6.86                        | 34.09  | 46.45        |
| 3               | 128      | 256       | 6.73                        | 31.83  | 44.96        |
| 4               | 256      | 256       | 4.53                        | 29.10  | 43.05        |
| 5               | 256      | 512       | 7.31                        | 30.62  | 44.36        |
| 6               | 512      | 512       | 6.41                        | 28.50  | 43.40        |
| 7               | 512      | 512       | 6.00                        | 26.48  | 42.94        |
| 8               | 512      | 512       | 4.00                        | 24.03  | 41.70        |
| 9               | 512      | 512       | 5.57                        | 24.89  | 42.56        |
| 10              | 512      | 512       | 5.50                        | 23.65  | 42.30        |
| 11              | 512      | 1024      | 7.00                        | 23.17  | 42.41        |
| 12              | 1024     | 1024      | 10.69                       | 28.25  | 45.77        |
| Network Average |          |           | 7.59                        | 26.50  | <b>43.78</b> |

**Table 5.** Branch level sparsity for all the pointwise (PW) layers of MobileNetV1 on ImageNet.  $C_{in}$  and  $C_{out}$  denote the number of input and output channels respectively.

every point wise layer. For the DBQ-2T model, which quantizes PW layers to two ternary branches, we find that on average 43.78% of all PW weights are zero, which explains the massive 35% reduction in  $C_S$ . In contrast, the DBQ-1T model, which quantizes all PW layers to one ternary branch, achieves a 26.5% average branch sparsity. While DBQ-2T has twice the number of branches compared to DBQ-1T, the per-branch sparsity is actually much higher for the DBQ-2T. In other words, while the number of pointwise parameters increases by  $2\times$  when going from 1T to 2T, due to the high branch sparsity, the number of non-zero parameters increases by  $1.53\times$  only. On the other hand, using 8b fixed-point for the PW layers yields very little weight sparsity (7.59%).

## References

1. Goyal, P., Dollár, P., Girshick, R., Noordhuis, P., Wesolowski, L., Kyrola, A., Tulloch, A., Jia, Y., He, K.: Accurate, large minibatch SGD: Training imagenet in 1 hour. arXiv preprint arXiv:1706.02677 (2017) 3
2. He, K., Zhang, X., Ren, S., Sun, J.: Deep residual learning for image recognition. In: Proceedings of the IEEE conference on computer vision and pattern recognition. pp. 770–778 (2016) 3
3. Huang, G., Liu, S., Van der Maaten, L., Weinberger, K.Q.: Condensenet: An efficient densenet using learned group convolutions. In: Proceedings of the IEEE Conference on Computer Vision and Pattern Recognition. pp. 2752–2761 (2018) 3
4. Loshchilov, I., Hutter, F.: SGDR: Stochastic gradient descent with warm restarts. arXiv preprint arXiv:1608.03983 (2016) 3

5. Paszke, A., Gross, S., Chintala, S., Chanan, G., Yang, E., DeVito, Z., Lin, Z., Desmaison, A., Antiga, L., Lerer, A.: Automatic differentiation in PyTorch. In: NIPS Autodiff Workshop (2017) 4
6. Uhlich, S., Mauch, L., Cardinaux, F., Yoshiyama, K., Garcia, J.A., Tiedemann, S., Kemp, T., Nakamura, A.: Mixed precision DNNs: All you need is a good parametrization. In: International Conference on Learning Representations (2020), <https://openreview.net/forum?id=Hyx0slrFvH> 7
